1 **3D architecture and structural flexibility revealed in the subfamily of large glutamate**  
2 **dehydrogenases by a mycobacterial enzyme**

3

4 Melisa Lázaro,<sup>1</sup> Roberto Melero,<sup>2</sup> Charlotte Huet,<sup>3†</sup> Jorge P. López-Alonso,<sup>1</sup> Sandra Delgado,<sup>1</sup>  
5 Alexandra Dodu,<sup>1</sup> Eduardo M. Bruch,<sup>4†</sup> Luciano A. Abriata,<sup>5,6</sup> Pedro M. Alzari,<sup>3</sup> Mikel Valle,<sup>1\*</sup>  
6 María-Natalia Lisa<sup>7,8,3\*</sup>

7

8 <sup>1</sup> Center for Cooperative Research in Biosciences (CIC bioGUNE), Basque Research and  
9 Technology Alliance (BRTA), Bizkaia Technology Park, Building 801A, 48160 Derio, Spain.

10 <sup>2</sup> Centro Nacional de Biotecnología, CNB-CSIC, Darwin 3, 28049 Madrid, Spain.

11 <sup>3</sup> Unité de Microbiologie Structurale, Institut Pasteur, CNRS UMR 3528, Université de Paris, 25  
12 rue du Docteur Roux, 75724 Paris, France.

13 <sup>4</sup> IGBMC, 1 Rue Laurent Fries, 67404 Illkirch, France.

14 <sup>5</sup> Laboratory for Biomolecular Modeling, School of Life Sciences, École Polytechnique Fédérale de  
15 Lausanne and Swiss Institute of Bioinformatics, Lausanne CH-1015, Switzerland.

16 <sup>6</sup> Protein Production and Structure Core Facility, School of Life Sciences, École Polytechnique  
17 Fédérale de Lausanne and Swiss Institute of Bioinformatics, Lausanne CH-1015, Switzerland.

18 <sup>7</sup> Instituto de Biología Molecular y Celular de Rosario (IBR CONICET-UNR), Rosario S2002LRK,  
19 Argentina.

20 <sup>8</sup> Plataforma de Biología Estructural y Metabólica (PLABEM), Rosario S2002LRK, Argentina.

21

22 \* Correspondence: MNL: [lisa@ibr-conicet.gov.ar](mailto:lisa@ibr-conicet.gov.ar); MV: [mvalle@cicbiogune.es](mailto:mvalle@cicbiogune.es)

23 †Present addresses: CH, DBV-Technologies, 177-181 Avenue Pierre Brossolette, 92120  
24 Montrouge, France; EMB, Unité de Microbiologie Structurale, Institut Pasteur, CNRS UMR 3528,  
25 Université de Paris, 25 rue du Docteur Roux, 75724 Paris, France.

## 26 **Summary**

27 Glutamate dehydrogenases (GDHs) are widespread metabolic enzymes that play key roles in  
28 nitrogen homeostasis. Large glutamate dehydrogenases composed of 180 kDa subunits (L-  
29 GDH<sub>S180</sub>) contain long N- and C-terminal segments flanking the catalytic core. Despite the  
30 relevance of L-GDH<sub>S180</sub> in bacterial physiology, the lack of structural data for these enzymes has  
31 limited the progress of functional studies. Here we show that the mycobacterial L-GDH<sub>S180</sub> (mL-  
32 GDH<sub>S180</sub>) adopts a quaternary structure that is radically different from that of related low molecular  
33 weight enzymes. Intersubunit contacts in mL-GDH<sub>S180</sub> involve a C-terminal domain that we propose  
34 as a new fold and a flexible N-terminal segment comprising ACT-like and PAS-type domains that  
35 could act as metabolic sensors for allosteric regulation. These findings uncover unique aspects of  
36 the structure-function relationship in the subfamily of L-GDHs.

37

## 38 **Keywords**

39 large glutamate dehydrogenases, *Mycobacterium*, amino acid metabolism, ACT-like domain, new  
40 fold, integrative structural biology

41

## 42 **Introduction**

43 Glutamate dehydrogenases (GDHs) are ubiquitous oligomeric enzymes that catalyze the reversible  
44 oxidative deamination of L-glutamate to 2-oxoglutarate, at the crossroad between the Krebs cycle  
45 and ammonium assimilation. GDHs are grouped into the subfamily of small GDHs composed of  
46 subunits of 50 kDa (S-GDH<sub>S50</sub>) and the subfamily of large GDHs (L-GDHs) composed of  
47 monomers of 115 kDa (L-GDH<sub>S115</sub>) or 180 kDa (L-GDH<sub>S180</sub>) (Miñambres et al., 2000). L-GDHs,  
48 found in lower eukaryotes and prokaryotes, are NAD<sup>+</sup> dependent enzymes that differ from S-  
49 GDH<sub>S50</sub> by the presence of long N- and C-terminal extensions flanking the catalytic domain  
50 (Miñambres et al., 2000). The possible role(s) of such terminal segments in oligomerization and/or  
51 enzyme regulation has remained largely unknown (Beaufay et al., 2015; Camardella et al., 2002;

52 Kawakami et al., 2007, 2010; Lu and Abdelal, 2001; Miñambres et al., 2000; Nott et al., 2009;  
53 O'Hare et al., 2008; Veronese et al., 1974).

54 The relevance of L-GDH<sub>s180</sub> in bacterial physiology has been emphasized in previous studies of  
55 environmental (Beaufay et al., 2015) and pathogenic species (DeJesus et al., 2013; Griffin et al.,  
56 2011). Among the later, the mycobacterial L-GDH<sub>s180</sub> (mL-GDH<sub>s180</sub>) is part of a signal transduction  
57 pathway that senses amino acid availability to control metabolism and virulence of *Mycobacterium*  
58 *tuberculosis* (Nott et al., 2009; Rieck et al., 2017; York, 2017). This enzyme is essential for the *in*  
59 *vitro* growth of the tubercle bacillus (DeJesus et al., 2013; Griffin et al., 2011) whereas it is crucial  
60 for *Mycobacterium bovis* BCG survival in media containing glutamate as the sole carbon source  
61 (Gallant et al., 2016). Moreover, diverse mechanisms have been implicated in the regulation of L-  
62 GDH<sub>s180</sub>. The catabolism of glutamate by mL-GDH<sub>s180</sub> is inhibited by the regulator GarA (Nott et  
63 al., 2009; O'Hare et al., 2008) when extracellular nitrogen donor amino acids are available (Rieck et  
64 al., 2017) whereas the L-GDH<sub>s180</sub> from *Streptomyces clavuligerus* (Miñambres et al., 2000) (filo  
65 Actinobacteria, which includes mycobacteria) as well as L-GDH<sub>s180</sub> from Proteobacteria  
66 (Kawakami et al., 2007, 2010; Lu and Abdelal, 2001) are directly regulated by amino acids.  
67 Despite the key roles of L-GDH<sub>s180</sub> in the redistribution of amino groups within cells, their 3D  
68 structure has remained elusive, preventing a deeper understanding of the molecular basis of enzyme  
69 function.

70 Here we report the 3D structure of the mL-GDH<sub>s180</sub> isoform from *Mycobacterium smegmatis*,  
71 obtained through an integrative approach that combined single-particle cryo-EM and X-ray protein  
72 crystallography data at resolutions between 4.11 and 6.27 Å. Our findings reveal unique  
73 characteristics of domain organization and oligomeric assembly in the L-GDH<sub>s</sub> subfamily, thus  
74 allowing to update the annotation of the Pfam family PF05088 that includes the L-GDH<sub>s180</sub>, and  
75 offer a rationale for the direct regulation of L-GDH<sub>s180</sub> by metabolites. Furthermore, our cryo-EM  
76 data uncover fluctuations of the quaternary structure of mL-GDH<sub>s180</sub> that are possibly relevant for  
77 the allosteric regulation of the enzyme activity.

## 78 **Results**

### 79 **The 3D architecture of mL-GDH<sub>180</sub>**

80 As revealed by X-ray protein crystallography and single-particle cryo-EM (**Figure 1** and **Figure 2**),  
81 mL-GDH<sub>180</sub> assembles into a homotetramer. mL-GDH<sub>180</sub> monomers are arranged around  
82 perpendicular two-fold axes that pass through a central cavity in the structure.

83 The 6.27 Å resolution crystal structure of the seleno-methionine (Se-Met) derivative of mL-GDH<sub>180</sub>  
84 (**Figure 1** and **Table 1**), obtained as illustrated in **Figure S1** through an integrative strategy that also  
85 included cryo-EM data up to 4.11 Å, revealed that the protein subunits display a unique domain  
86 organization (**Figure 1A**). The N-terminal segment comprises three ACT (*Aspartate kinase-  
87 Chorismate mutase-TyrA*)-like (Lang et al., 2014) (hereafter ACT\*, see below) domains (ACT\*1-  
88 3), a PAS (*Per-Arnt-Sim*)-type (Möglich et al., 2009) domain and three helical motifs (HM1-3).  
89 Notably, the primary structures of ACT and PAS domains are poorly conserved and, therefore,  
90 these modules are often difficult to identify from BLAST searches (Lang et al., 2014; Möglich et  
91 al., 2009). The C-terminal region consists of a single helical domain that showed no detectable  
92 structural similarity to previously characterized proteins in Dali (Holm, 2020), ECOD (Cheng et al.,  
93 2014), CATH (Dawson et al., 2017) and VAST (Madej et al., 2014) searches and, therefore,  
94 constitutes a possible new fold.

95 The catalytic domains in the mL-GDH<sub>180</sub> complex were not found to contribute intersubunit  
96 contacts (**Figure 1A**). Instead, the N- and C-terminal regions of mL-GDH<sub>180</sub> provide dimer-like  
97 interactions between pairs of monomers. Contacts between mL-GDH<sub>180</sub> subunits engage the  
98 ACT\*2, ACT\*3 and C-terminal domains (**Figure 1B**). Most of the residues involved in interfacial  
99 hydrogen bonds or salt bridges in mL-GDH<sub>180</sub> are strictly conserved in the enzyme isoform from *M.*  
100 *tuberculosis* (O53203, 72% sequence identity) (Nott et al., 2009), the L-GDH<sub>180</sub> from *S.*  
101 *clavuligerus* (E2Q5C0, 47% sequence identity) (Miñambres et al., 2000) and the L-GDH<sub>115</sub> from  
102 *Nocardia farcinica* (A0A0H5NTF9, 55% sequence identity over non-gap aligned columns). Except  
103 for a single amino acid (Arg560), the same group of residues is also conserved in the L-GDH<sub>180</sub>

104 from *P. aeruginosa* (Q9HZE0, 40% sequence identity) (Lu and Abdelal, 2001). These observations  
105 underscore the functional relevance of the oligomeric assembly found for mL-GDH<sub>180</sub>.

106 ACT and PAS modules are known to regulate functionally diverse proteins by driving  
107 conformational and/or quaternary structural changes (Lang et al., 2014; Mögliche et al., 2009). The  
108 binding of specific amino acids to ACT-ACT interfaces confers allosteric control to oligomeric  
109 enzymes involved in amino acid metabolism (Lang et al., 2014) whereas PAS modules sense and  
110 transduce chemical or physical stimuli to typically dimeric effector domains (Mögliche et al., 2009).

111 The ACT\* domains of mL-GDH<sub>180</sub> differ from the archetypal ACT fold in that strand  $\beta_1$  is located  
112 in the position usually occupied by strand  $\beta_4$ , creating an ACT-like  $\beta\beta\alpha\beta\beta\alpha$  topology with a  
113  $\beta_1\beta_2\beta_4\beta_3$  antiparallel sheet (Figure 1B and Figure S2). Similar variations of the characteristic ACT  
114 fold have been described for aspartate kinases and a mammalian tyrosine hydroxylase (Lang et al.,  
115 2014; Zhang et al., 2014), including sixteen core residues that are conserved in the ACT\*1-3  
116 domains of mL-GDH<sub>180</sub> (Figure S2). Notably, the interaction between ACT\*3 modules in mL-  
117 GDH<sub>180</sub> produces a continuous eight-stranded antiparallel  $\beta$ -sheet with helices on one side (Figure  
118 1B). A similar side-by-side arrangement of ACT domains generates allosteric amino acid binding  
119 sites in 3-phosphoglycerate synthases and aspartate kinases (Lang et al., 2014). Close to a dimer-  
120 like interface, the PAS module in mL-GDH<sub>180</sub> adopts a typical fold (Figure 1C), comprising a core  
121 five-stranded  $\beta$ -sheet usually involved in signal sensing (Mögliche et al., 2009), and displays up to  
122 12% sequence identity with PAS domains in sensor histidine kinases retrieved in Dali (Holm, 2020)  
123 searches.

124 Similarly to S-GDH<sub>50</sub>, the catalytic core of mL-GDH<sub>180</sub> consists of subdomains SDI and SDII  
125 (Figure 1D), with the active site located in a groove in-between. Functionally important residues in  
126 the catalytic domain of L-GDH<sub>180</sub> have been previously identified by their conservation in  
127 sequence comparisons of diverse GDHs (Miñambres et al., 2000). The SDI in mL-GDH<sub>180</sub> contains  
128 most of the residues of the glutamate-binding region whereas the SDII conforms the dinucleotide-  
129 binding site.

## 130 **Intrinsic flexibility and alternate conformers of mL-GDH<sub>180</sub>**

131 Cryo-EM and SAXS data uncovered the intrinsic flexibility of native mL-GDH<sub>180</sub> (Figure 2, Figure  
132 S3 and Table S1). 2D averages for side views of mL-GDH<sub>180</sub> tetramers revealed a high degree of  
133 flexibility at distal ends, where ACT\*1-2 and PAS domains reside, and their corresponding  
134 densities vanished in 3D cryo-EM maps (Figure 2A). A 3D-classification of the detected mL-  
135 GDH<sub>180</sub> particles was performed to distinguish alternate conformers of the enzyme. Two mL-  
136 GDH<sub>180</sub> conformers were found, called the open and close conformations (Figure 2B), for which the  
137 ACT\*3 module, the HM3, the catalytic domain and the C-terminal region were defined in each  
138 monomer, achieving an estimated 4.11 Å resolution for this region in the open conformation  
139 (Figure 2C-D, Figure S4 and Table 2). The two conformers differ in the relative positions of the  
140 centers of mass of the subunits (Figure 2B). The catalytic domains in mL-GDH<sub>180</sub> monomers in  
141 contact through their N-terminal segments are found closer to each other in the less stable close  
142 conformation compared to the open form. Overall, these findings reveal transitions of the  
143 quaternary structure that could intervene in the allosteric regulation of the enzyme.

144

## 145 **Discussion**

146 L-GDH<sub>180</sub> were discovered in 2000 from a study of *Streptomyces clavurigerus* (Miñambres et al.,  
147 2000) and were later isolated from other diverse bacterial species, including *Pseudomonas*  
148 *aeruginosa* (Lu and Abdelal, 2001), psychrophilic bacteria (Camardella et al., 2002; Kawakami et  
149 al., 2007, 2010), *Caulobacter crescentus* (Beaufay et al., 2015) and *Mycobacterium* spp (Nott et al.,  
150 2009; O'Hare et al., 2008). As sequences of L-GDHs were identified, they were analyzed in light of  
151 the available crystallographic evidence for S-GDH<sub>50</sub> (Britton et al., 1992; Miñambres et al., 2000).  
152 S-GDH<sub>50</sub> are hexameric enzymes in which the oligomeric interfaces are conformed by motifs that  
153 are located within the catalytic domain (Britton et al., 1992; Miñambres et al., 2000). Most of these  
154 motifs are substantially modified in L-GDHs, either through sequence changes, insertions or  
155 deletions (Britton et al., 1992; Miñambres et al., 2000). In agreement with proposals that the

156 oligomeric assembly would then be different for the two enzyme subfamilies (Britton et al., 1992;  
157 Miñambres et al., 2000), the quaternary structure of mL-GDH<sub>180</sub> depends on interactions  
158 established by the N- and C-terminal regions flanking the catalytic domain (Figure 1A) and is  
159 radically different from that of S-GDH<sub>50</sub> (Figure 2E). The stoichiometry of the mL-GDH<sub>180</sub>  
160 complex observed by cryo-EM and X-ray protein crystallography (Figure 1 and Figure 2) is  
161 supported by molecular weight estimates from SAXS data (Table S1) and is consistent with  
162 previous reports of tetrameric complexes of L-GDHs studied in solution (Lu and Abdelal, 2001;  
163 Veronese et al., 1974). Furthermore, most of the residues involved in interactions between mL-  
164 GDH<sub>180</sub> monomers are conserved (Figure 1B) not only in mycobacterial isoforms of the enzyme but  
165 also in L-GDHs from diverse species in Actinobacteria and Proteobacteria. This suggests that the  
166 oligomeric assembly of mL-GDH<sub>180</sub> may be a common theme in the enzyme subfamily.

167 The catalytic domains in the mL-GDH<sub>180</sub> complex are oriented opposite to those in S-GDH<sub>50</sub>  
168 (Figure 2E), with the SDI (Figure 1D) directed toward the distal ends of the protein, where the  
169 monomers N-terminal region resides. This segment comprises ACT-like modules as well as a PAS-  
170 like domain arranged in tandem (Figure 1A) and shows a high degree of flexibility (Figure 2A). A  
171 comparison of the mL-GDH<sub>180</sub> conformers identified by cryo-EM (Figure 2B) shows that  
172 conformational changes in the N-terminal region correlate with alterations in the relative positions  
173 of the catalytic domains. Taking into account the known roles of ACT modules in the allosteric  
174 control of oligomeric enzymes involved in amino acid metabolism (Lang et al., 2014), our findings  
175 offer a rationale for previous evidence pointing out the direct regulation of diverse L-GDH<sub>180</sub> by  
176 metabolites (Lu and Abdelal, 2001; Miñambres et al., 2000).

177 In conclusion, our findings suggest that the N-terminal segment of mL-GDH<sub>180</sub> (as well as in  
178 related enzymes) could transduce intracellular metabolic stimuli to the catalytic core by driving  
179 changes in the quaternary structure. The reported 3D model of mL-GDH<sub>180</sub> can now frame future  
180 studies to dissect the structure-function relationship of this enzyme and other members of the L-  
181 GDHs subfamily.



## 182 **Acknowledgments**

183 The authors acknowledge the support and the use of resources of Instruct, a Landmark ESFRI  
184 project and Instruct Image Processing Center (I2PC) through Instruct Access Project PID6258,  
185 NVIDIA Corporation for the donation of the Quadro GP100 GPU used for this research, the eBIC  
186 Electron Bio-Imaging Centre (Diamond light source, Oxford) and the Netherlands Centre for  
187 Electron Nanoscopy (Leiden, Netherlands) for the collection of cryo-EM images, and the European  
188 Synchrotron Radiation Facility (Grenoble, France) for the collection of diffraction and SAXS data.  
189 We thank David Gil, Ariel Mechaly, Ahmed Haouz and Pascal Le Normand for technical advice  
190 and insightful discussions. This work was supported by the grant PICT 2017-1932, from the  
191 Agencia Nacional de Promoción de la Investigación, el Desarrollo Tecnológico y la Innovación  
192 (Agencia I+D+i, Argentina), received by MNL, and the grant PGC2018-098996-B-100 from the  
193 Spanish Ministerio de Ciencia e Innovación, received by MV. MV thanks the AEI (Agencia Estatal  
194 de Investigación) for the Severo Ochoa Excellence Accreditation (SEV-2016-0644).

195

## 196 **Author contributions**

197 ML produced protein, prepared EM samples, performed EM experiments, processed and analysed  
198 EM data, and performed structural analyses; RM determined the initial cryo-EM model; CH  
199 optimized protein production; JPLA processed and analysed EM data; SD contributed to protein  
200 production and the preparation of EM samples; AD contributed to protein production; EMB  
201 analysed SAXS data; LAA contributed to *ab initio* modelling and structural analyses; PMA  
202 designed experiments and analysed data; MV designed experiments, attended EM data collection  
203 and processing and analysed results; MNL cloned the gene of mL-GDH<sub>180</sub>, optimized protein  
204 production, produced protein, obtained protein crystals, solved the crystal structure of the protein,  
205 refined the structure of mL-GDH<sub>180</sub> obtained by cryo-EM, designed experiments, acquired data,  
206 analysed data and wrote the paper. All authors read and corrected the paper.

207



208 **Declaration of interests**

209 The authors declare no competing interests.

210

211 **Deposition of structures and maps**

212 Cryo-EM maps obtained for mL-GDH<sub>180</sub> were deposited in the Electron Microscopy Data Bank  
213 under the accession codes EMD-11606 (open conformation), EMD-11612 (close conformation) and  
214 EMD-11613 (monomer). Atomic coordinates for the open form of mL-GDH<sub>180</sub> derived from cryo-  
215 EM data were deposited in the Protein Data Bank under the accession code 7A1D. Structure factors  
216 and atomic coordinates obtained for Se-Met mL-GDH<sub>180</sub> by X-ray protein crystallography were  
217 deposited in the Protein Data Bank under the accession code 7JSR.

218

219 **References**

220 Abriata, L.A., and Dal Peraro, M. (2020). State-of-the-art web services for de novo protein structure  
221 prediction. *Brief. Bioinform.* *bbaa139*.

222 Abriata, L.A., Tamò, G.E., Monastyrskyy, B., Kryshtafovych, A., and Dal Peraro, M. (2018).  
223 Assessment of hard target modeling in CASP12 reveals an emerging role of alignment-based  
224 contact prediction methods. *Proteins Struct. Funct. Bioinforma.* *86*, 97–112.

225 Abriata, L.A., Tamò, G.E., and Dal Peraro, M. (2019). A further leap of improvement in tertiary  
226 structure prediction in CASP13 prompts new routes for future assessments. *Proteins Struct. Funct.*  
227 *Bioinforma.* *87*, 1100–1112.

228 Afonine, P. V., Grosse-Kunstleve, R.W., Echols, N., Headd, J.J., Moriarty, N.W., Mustyakimov,  
229 M., Terwilliger, T.C., Urzhumtsev, A., Zwart, P.H., and Adams, P.D. (2012). Towards automated  
230 crystallographic structure refinement with phenix.refine. *Acta Crystallogr. Sect. D Biol.*  
231 *Crystallogr.* *68*, 352–367.

232 Afonine, P. V., Poon, B.K., Read, R.J., Sobolev, O. V., Terwilliger, T.C., Urzhumtsev, A., and  
233 Adams, P.D. (2018). Real-space refinement in PHENIX for cryo-EM and crystallography. *Acta*  
234 *Crystallogr. Sect. D Struct. Biol.* *74*, 531–544.

235 Beaufay, F., Coppine, J., Mayard, A., Laloux, G., De Bolle, X., and Hallez, R. (2015). A NAD-

- 236 dependent glutamate dehydrogenase coordinates metabolism with cell division in *Caulobacter*  
237 *crescentus*. *EMBO J.* *34*, 1786–1800.
- 238 Bernadó, P. (2010). Effect of interdomain dynamics on the structure determination of modular  
239 proteins by small-angle scattering. *Eur. Biophys. J.* *39*, 769–780.
- 240 Britton, K.L., Baker, P.J., Rice, D.W., and Stillman, T.J. (1992). Structural relationship between  
241 the hexameric and tetrameric family of glutamate dehydrogenases. *Eur. J. Biochem.* *209*, 851–859.
- 242 Cabrita, L.D., Dai, W., and Bottomley, S.P. (2006). A family of *E. coli* expression vectors for  
243 laboratory scale and high throughput soluble protein production. *BMC Biotechnol* *6*, 12.
- 244 Camardella, L., Di Fraia, R., Antignani, A., Ciardiello, M.A., Di Prisco, G., Coleman, J.K., Buchon,  
245 L., Guespin, J., and Russell, N.J. (2002). The Antarctic Psychrobacter sp. TAD1 has two cold-  
246 active glutamate dehydrogenases with different cofactor specificities. Characterisation of the  
247 NAD<sup>+</sup>-dependent enzyme. *Comp. Biochem. Physiol. - A Mol. Integr. Physiol.* *131*, 559–567.
- 248 Cheng, H., Schaeffer, R.D., Liao, Y., Kinch, L.N., Pei, J., Shi, S., Kim, B.H., and Grishin, N. V.  
249 (2014). ECOD: An Evolutionary Classification of Protein Domains. *PLoS Comput. Biol.* *10*,  
250 e1003926.
- 251 Dawson, N.L., Lewis, T.E., Das, S., Lees, J.G., Lee, D., Ashford, P., Orengo, C.A., and Sillitoe, I.  
252 (2017). CATH: An expanded resource to predict protein function through structure and sequence.  
253 *Nucleic Acids Res.* *45*, D289–D295.
- 254 DeJesus, M.A., Zhang, Y.J., Sasseti, C.M., Rubin, E.J., Sacchettini, J.C., and Ioerger, T.R. (2013).  
255 Bayesian analysis of gene essentiality based on sequencing of transposon insertion libraries.  
256 *Bioinformatics* *29*, 695–703.
- 257 Doniach, S. (2001). Changes in biomolecular conformation seen by small angle X-ray scattering.  
258 *Chem. Rev.* *101*, 1763–1778.
- 259 Emsley, P., Lohkamp, B., Scott, W.G., and Cowtan, K. (2010). Features and development of Coot.  
260 *Acta Crystallogr. Sect. D Biol. Crystallogr.* *66*, 486–501.
- 261 England, P., Wehenkel, A., Martins, S., Hoos, S., André-Leroux, G., Villarino, A., and Alzari, P.M.  
262 (2009). The FHA-containing protein GarA acts as a phosphorylation-dependent molecular switch in  
263 mycobacterial signaling. *FEBS Lett.* *583*, 301–307.
- 264 Evans, P.R., and Murshudov, G.N. (2013). How good are my data and what is the resolution? *Acta*

- 265 Crystallogr. Sect. D Biol. Crystallogr. *69*, 1204–1214.
- 266 Franke, D., Petoukhov, M. V., Konarev, P. V., Panjkovich, A., Tuukkanen, A., Mertens, H.D.T.,  
267 Kikhney, A.G., Hajizadeh, N.R., Franklin, J.M., Jeffries, C.M., et al. (2017). ATSAS 2.8: A  
268 comprehensive data analysis suite for small-angle scattering from macromolecular solutions. *J.*  
269 *Appl. Crystallogr.* *50*, 1212–1225.
- 270 Gallant, J.L., Viljoen, A.J., Van Helden, P.D., and Wiid, I.J.F. (2016). Glutamate dehydrogenase is  
271 required by mycobacterium bovis BCG for resistance to cellular stress. *PLoS One* *11*, 1–14.
- 272 Griffin, J.E., Gawronski, J.D., DeJesus, M.A., Ioerger, T.R., Akerley, B.J., and Sasseti, C.M.  
273 (2011). High-resolution phenotypic profiling defines genes essential for mycobacterial growth and  
274 cholesterol catabolism. *PLoS Pathog.* *7*, e1002251.
- 275 Headd, J.J., Echols, N., Afonine, P. V., Grosse-Kunstleve, R.W., Chen, V.B., Moriarty, N.W.,  
276 Richardson, D.C., Richardson, J.S., and Adams, P.D. (2012). Use of knowledge-based restraints in  
277 phenix.refine to improve macromolecular refinement at low resolution. *Acta Crystallogr. Sect. D*  
278 *Biol. Crystallogr.* *68*, 381–390.
- 279 Holm, L. (2020). DALI and the persistence of protein shape. *Protein Sci.* *29*, 128–140.
- 280 Kabsch, W. (2010). XDS. *Acta Crystallogr. Sect. D* *66*, 125–132.
- 281 Kawakami, R., Sakuraba, H., and Ohshima, T. (2007). Gene cloning and characterization of the  
282 very large NAD-dependent L-glutamate dehydrogenase from the psychrophile *Janthinobacterium*  
283 *lividum*, isolated from cold soil. *J. Bacteriol.* *189*, 5626–5633.
- 284 Kawakami, R., Oyama, M., Sakubara, H., and Ohshima, T. (2010). The Unique Kinetic Behavior of  
285 the Very Large NAD-Dependent Glutamate Dehydrogenase from *Janthinobacterium lividum*.  
286 *Biosci. Biotechnol. Biochem.* *74*, 884–887.
- 287 Kidmose, R.T., Juhl, J., Nissen, P., Boesen, T., Karlsen, J.L., and Pedersen, B.P. (2019).  
288 Namdinator - Automatic molecular dynamics flexible fitting of structural models into cryo-EM and  
289 crystallography experimental maps. *IUCrJ* *6*, 526–531.
- 290 Konarev, P. V., Volkov, V. V., Sokolova, A. V., Koch, M.H.J., and Svergun, D.I. (2003). PRIMUS:  
291 A Windows PC-based system for small-angle scattering data analysis. *J. Appl. Crystallogr.* *36*,  
292 1277–1282.
- 293 Kucukelbir, A., Sigworth, F.J., and Tagare, H.D. (2014). Quantifying the local resolution of cryo-

- 294 EM density maps. *Nat. Methods* *11*, 63–65.
- 295 de la Rosa-Trevín, J.M., Quintana, A., del Cano, L., Zaldívar, A., Foche, I., Gutiérrez, J., Gómez-  
296 Blanco, J., Burguet-Castell, J., Cuenca-Alba, J., Abrishami, V., et al. (2016). Scipion: A software  
297 framework toward integration, reproducibility and validation in 3D electron microscopy. *J. Struct.*  
298 *Biol.* *195*, 93–99.
- 299 Lang, E.J.M., Cross, P.J., Mittelstädt, G., Jameson, G.B., and Parker, E.J. (2014). Allosteric  
300 ACTion: The varied ACT domains regulating enzymes of amino-acid metabolism. *Curr. Opin.*  
301 *Struct. Biol.* *29*, 102–111.
- 302 Li, X., Mooney, P., Zheng, S., Booth, C.R., Braunfeld, M.B., Gubbens, S., Agard, D.A., and Cheng,  
303 Y. (2013). Electron counting and beam-induced motion correction enable near-atomic-resolution  
304 single-particle cryo-EM. *Nat. Methods* *10*, 584–590.
- 305 Liebschner, D., Afonine, P. V., Baker, M.L., Bunkoczi, G., Chen, V.B., Croll, T.I., Hintze, B.,  
306 Hung, L.W., Jain, S., McCoy, A.J., et al. (2019). Macromolecular structure determination using X-  
307 rays, neutrons and electrons: Recent developments in Phenix. *Acta Crystallogr. Sect. D Struct. Biol.*  
308 *75*, 861–877.
- 309 Lu, C.D., and Abdelal, A.T. (2001). The *gdhB* gene of *Pseudomonas aeruginosa* encodes an  
310 arginine-inducible NAD<sup>+</sup>-dependent glutamate dehydrogenase which is subject to allosteric  
311 regulation. *J. Bacteriol.* *183*, 490–499.
- 312 Madej, T., Lanczycki, C.J., Zhang, D., Thiessen, P.A., Geer, R.C., Marchler-Bauer, A., and Bryant,  
313 S.H. (2014). MMDB and VAST+: Tracking structural similarities between macromolecular  
314 complexes. *Nucleic Acids Res.* *42*, D297–D303.
- 315 McCoy, A.J., Grosse-Kunstleve, R.W., Adams, P.D., Winn, M.D., Storoni, L.C., and Read, R.J.  
316 (2007). Phaser crystallographic software. *J. Appl. Crystallogr.* *40*, 658–674.
- 317 Miñambres, B., Olivera, E.R., Jensen, R.A., and Luengo, J.M. (2000). A new class of glutamate  
318 dehydrogenases (GDH): Biochemical and genetic characterization of the first member, the AMP-  
319 requiring NAD-specific GDH of *Streptomyces clavuligerus*. *J. Biol. Chem.* *275*, 39529–39542.
- 320 Möglich, A., Ayers, R.A., and Moffat, K. (2009). Structure and Signaling Mechanism of Per-  
321 ARNT-Sim Domains. *Structure* *17*, 1282–1294.
- 322 Nott, T.J., Kelly, G., Stach, L., Li, J., Westcott, S., Patel, D., Hunt, D.M., Howell, S., Buxton, R.S.,

- 323 O'Hare, H.M., et al. (2009). An Intramolecular Switch Regulates Phosphoindependent FHA  
324 Domain Interactions in *Mycobacterium tuberculosis*. *Sci. Signal.* *2*, ra12.
- 325 O'Hare, H.M., Durán, R., Cerveñansky, C., Bellinzoni, M., Wehenkel, A.M., Pritsch, O., Obal, G.,  
326 Baumgartner, J., Vialaret, J., Johnsson, K., et al. (2008). Regulation of glutamate metabolism by  
327 protein kinases in mycobacteria. *Mol. Microbiol.* *70*, 1408–1423.
- 328 Pettersen, E.F., Goddard, T.D., Huang, C.C., Couch, G.S., Greenblatt, D.M., Meng, E.C., and  
329 Ferrin, T.E. (2004). UCSF Chimera - A visualization system for exploratory research and analysis.  
330 *J. Comput. Chem.* *25*, 1605–1612.
- 331 Rieck, B., Degiacomi, G., Zimmermann, M., Cascioferro, A., Boldrin, F., Lazar-Adler, N.R.,  
332 Bottrill, A.R., le Chevalier, F., Frigui, W., Bellinzoni, M., et al. (2017). PknG senses amino acid  
333 availability to control metabolism and virulence of *Mycobacterium tuberculosis*. *PLoS Pathog.* *13*,  
334 e1006399.
- 335 Rohou, A., and Grigorieff, N. (2015). CTFFIND4: Fast and accurate defocus estimation from  
336 electron micrographs. *J. Struct. Biol.* *192*, 216–221.
- 337 Sali, A., and Blundell, T. (1994). Sali, A. & Blundell, T. L. Comparative modelling by satisfaction  
338 of spatial restraints. *J. Mol. Biol.* *234*, 779-815. *J. Mol. Biol.* *234*, 779–815.
- 339 Svergun, D.I. (1992). Determination of the regularization parameter in indirect-transform methods  
340 using perceptual criteria. *J. Appl. Crystallogr.* *25*, 495–503.
- 341 Svergun, D.I. (1999). Restoring low resolution structure of biological macromolecules from  
342 solution scattering using simulated annealing. *Biophys. J.* *76*, 2879–2886.
- 343 Tang, G., Peng, L., Baldwin, P.R., Mann, D.S., Jiang, W., Rees, I., and Ludtke, S.J. (2007).  
344 EMAN2: An extensible image processing suite for electron microscopy. *J. Struct. Biol.* *157*, 38–46.
- 345 Terwilliger, T.C., Grosse-Kunstleve, R.W., Afonine, P. V., Moriarty, N.W., Zwart, P.H., Hung,  
346 L.W., Read, R.J., and Adams, P.D. (2007). Iterative model building, structure refinement and  
347 density modification with the PHENIX AutoBuild wizard. *Acta Crystallogr. Sect. D Biol.*  
348 *Crystallogr.* *64*, 61–69.
- 349 Terwilliger, T.C., Adams, P.D., Afonine, P. V., and Sobolev, O. V. (2018). A fully automatic  
350 method yielding initial models from high-resolution cryo-electron microscopy maps. *Nat. Methods*  
351 *15*, 905–908.

- 352 Vargas, J., Álvarez-Cabrera, A.L., Marabini, R., Carazo, J.M., and Sorzano, C.O.S. (2014).  
353 Efficient initial volume determination from electron microscopy images of single particles.  
354 *Bioinformatics* *30*, 2891–2898.
- 355 Veronese, F.M., Nyc, J.F., Brown, D.M., and Smith, E.L. (1974). Nicotinamide Adenine  
356 Dinucleotide-specific Glutamate Dehydrogenase of *Neurospora*. *J. Biol. Chem.* *249*, 7922–7929.
- 357 Wang, S., Sun, S., Li, Z., Zhang, R., and Xu, J. (2017). Accurate De Novo Prediction of Protein  
358 Contact Map by Ultra-Deep Learning Model. *PLoS Comput. Biol.* *13*, e1005324.
- 359 Winn, M.D., Ballard, C.C., Cowtan, K.D., Dodson, E.J., Emsley, P., Evans, P.R., Keegan, R.M.,  
360 Krissinel, E.B., Leslie, A.G.W., McCoy, A., et al. (2011). Overview of the CCP4 suite and current  
361 developments. *Acta Crystallogr. Sect. D* *67*, 235–242.
- 362 Xu, J. (2018). Distance-based Protein Folding Powered by Deep Learning. *BioRxiv* 465955.
- 363 York, A. (2017). Bacterial physiology: An inside job on metabolism. *Nat. Rev. Microbiol.* *15*, 383–  
364 383.
- 365 Zhang, S., Huang, T., Ilangovan, U., Hinck, A.P., and Fitzpatrick, P.F. (2014). The solution  
366 structure of the regulatory domain of tyrosine hydroxylase. *J. Mol. Biol.* *426*, 1483–1497.
- 367 Zheng, S.Q., Palovcak, E., Armache, J.-P., Verba, K.A., Cheng, Y., and Agard, D.A. (2017).  
368 MotionCor2: anisotropic correction of beam-induced motion for improved cryo-electron  
369 microscopy. *Nat. Methods* *14*, 331–332.
- 370 Zimmermann, L., Stephens, A., Nam, S.Z., Rau, D., Kübler, J., Lozajic, M., Gabler, F., Söding, J.,  
371 Lupas, A.N., and Alva, V. (2018). A Completely Reimplemented MPI Bioinformatics Toolkit with  
372 a New HHpred Server at its Core. *J. Mol. Biol.* *430*, 2237–2243.
- 373 Zivanov, J., Nakane, T., Forsberg, B.O., Kimanius, D., Hagen, W.J.H., Lindahl, E., and Scheres,  
374 S.H.W. (2018). New tools for automated high-resolution cryo-EM structure determination in  
375 RELION-3. *Elife* *7*, e42166.
- 376
- 377



378 **Figures and figure legends**

379 **Figure 1**

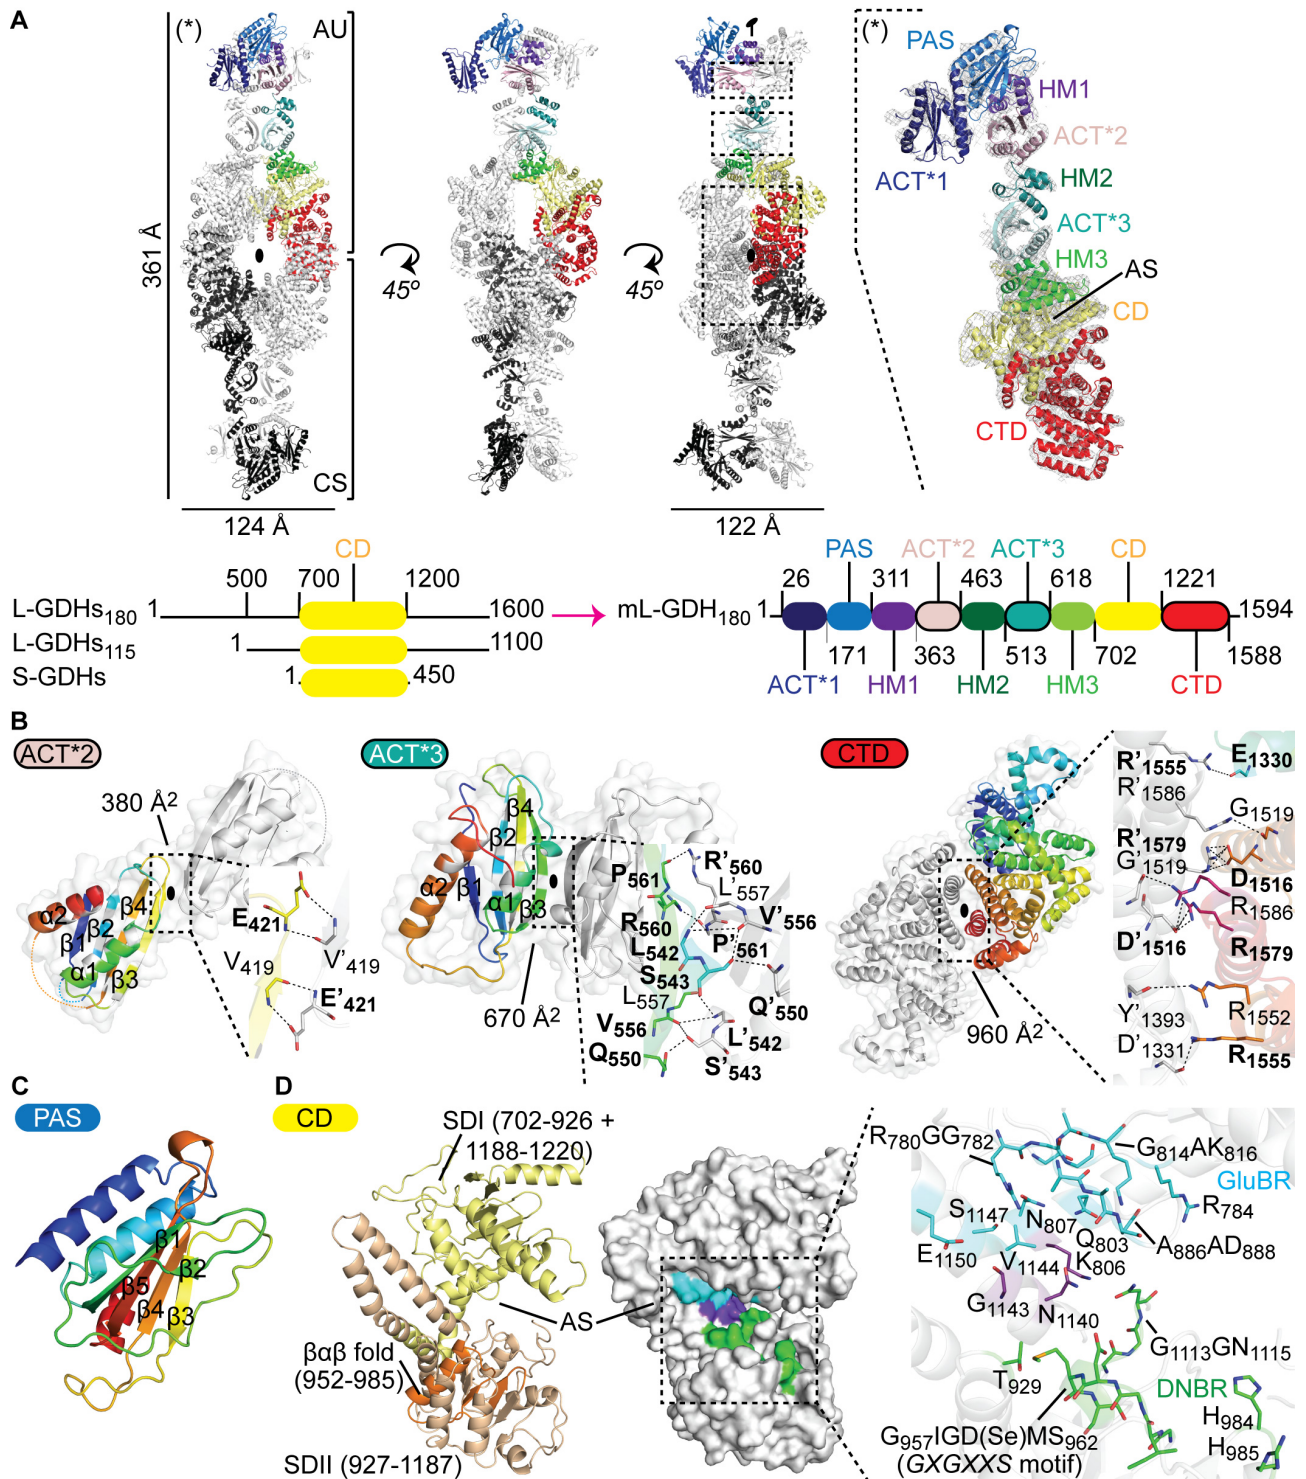

380

381 **Crystal structure of Se-Met mL-GDH<sub>180</sub>.** (A) The asymmetric unit (AU) contains two monomers  
 382 (RMSD of 0.51 Å for 289 alpha carbons in segment 45-362, 0.26 Å for 1163 alpha carbons in  
 383 segment 368-1588); a tetramer (as ribbons) is formed by crystallographic symmetry (CS); oval  
 384 symbols represent two-fold axes. The  $2mFo-DFc$  electron density (gray mesh), contoured to 1.5  $\sigma$ ,



385 is shown for one protein subunit on the right. Domains boundaries are given in residue numbers in a  
386 scheme below; CD, catalytic domain; CTD, C-terminal domain; AS, active site. A comparative  
387 scheme of L-GDH<sub>s180</sub>, L-GDH<sub>s115</sub> and S-GDH<sub>s50</sub> is also provided, with approximate residue  
388 numbers. **(B)** Oligomeric interfaces (areas in Å<sup>2</sup>) involve the domains ACT\*2, ACT\*3 and CTD.  
389 Contacting residues (as sticks in insets) labeled in bold characters are strictly conserved in diverse  
390 L-GDHs. The topology of domains ACT\*2 and ACT\*3 is highlighted with rainbow colors; white  
391 positions within the rainbow depict conserved core residues (Lang et al., 2014). **(C)** The PAS  
392 domain. **(D)** The CD is shown with the SDI and SDII in yellow and orange, respectively. The βαβ  
393 motif is involved in dinucleotide binding (Miñambres et al., 2000). The glutamate-binding region  
394 (GluBR, cyan) and the dinucleotide-binding region (DNBR, green) (Miñambres et al., 2000) are  
395 highlighted in a surface representation and as sticks in an inset. Residues in purple conform both  
396 binding regions (Miñambres et al., 2000).

397

398 **Figure 2**

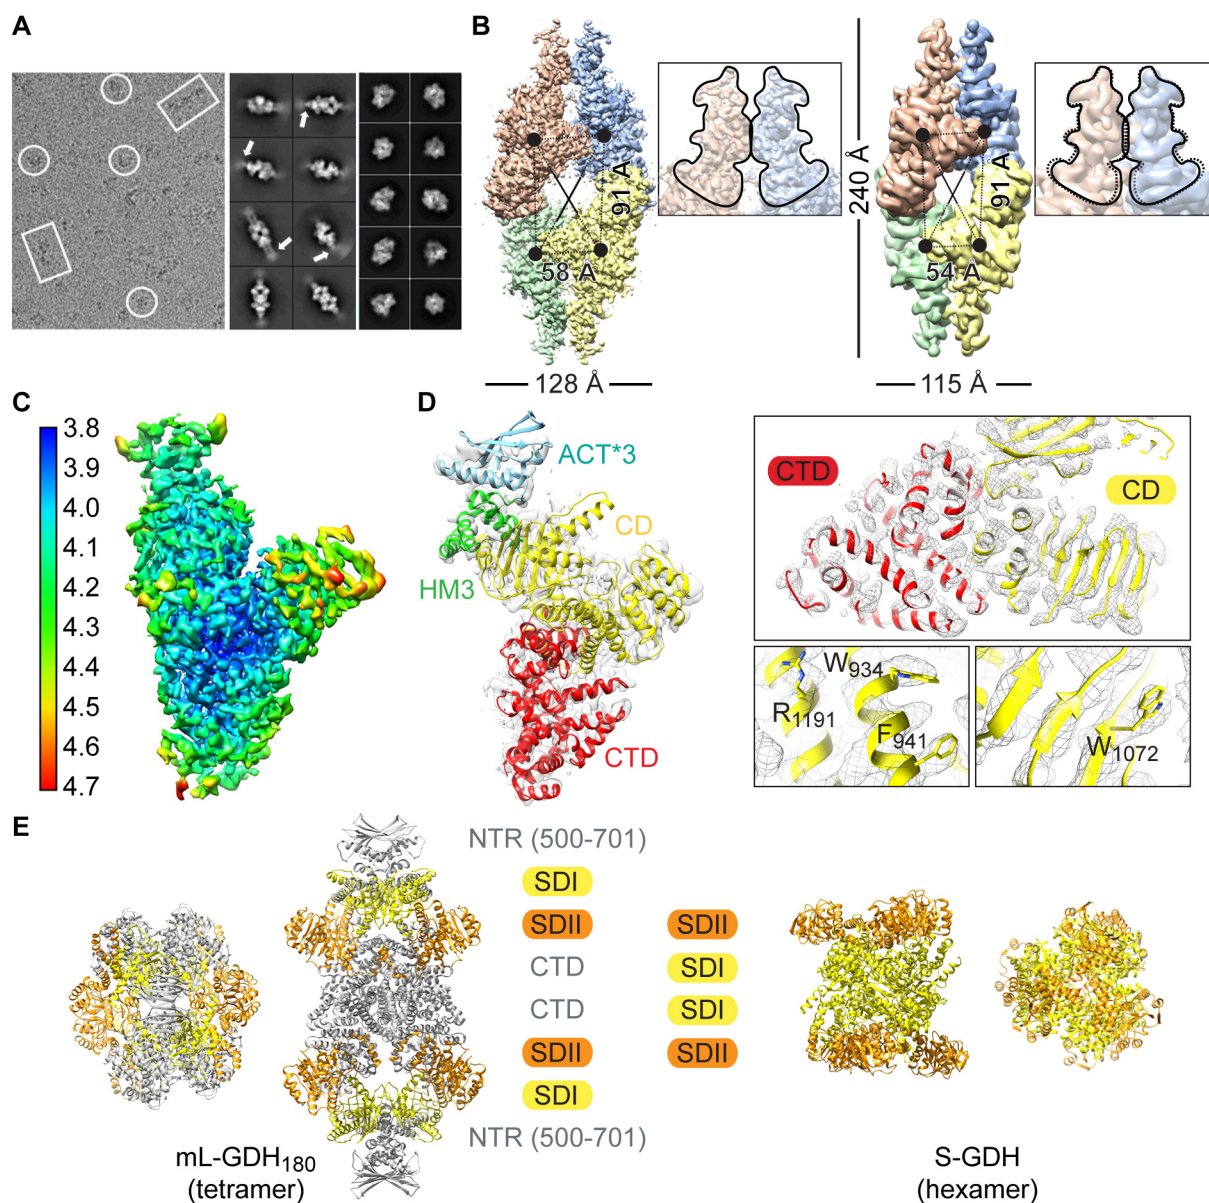

399

400 **Intrinsic flexibility and alternate conformers of native mL-GDH<sub>180</sub>.** (A) Cryo-EM image  
 401 obtained for mL-GDH<sub>180</sub> (left panel) showing side (rectangles) and top (circle) views for single  
 402 particles. The 2D class averages for mL-GDH<sub>180</sub> tetramers (right panels) display flexible ends at  
 403 side views (white arrows). (B) Cryo-EM density maps for the open (left, 4.47 Å resolution) and  
 404 close (right, 6.6 Å resolution) conformations of mL-GDH<sub>180</sub> tetramers, segmented into the four  
 405 subunits. (•): centers of mass of the subunits. Insets are close-up views of the contact zone between  
 406 the N-terminal regions (NTRs, contoured as —) of two monomers; the contour of the NTRs of the  
 407 open form is also shown as (---) on the closed conformation, for comparison. (C) Local resolution  
 408 for a single subunit of the open conformation after focused refinement (average resolution is 4.11

409 Å). **(D)** Cryo-EM map for one mL-GDH<sub>180</sub> subunit and the fitted atomic coordinates. Domains  
410 colors and labels are as in **Figure 1**. Insets are close-up views; selected amino acid side chains are  
411 shown as sticks. **(E)** Comparison of the quaternary structure of mL-GDH<sub>180</sub> and a representative  
412 hexameric S-GDH<sub>50</sub> (PDB code 3SBO). The catalytic domains are colored into SDI (yellow) and  
413 SDII (orange). The NTRs (only the portion that is well defined in cryo-EM maps is displayed) and  
414 the CTDs of mL-GDH<sub>180</sub> monomers are depicted in gray.

415 **Tables**

416 **Table 1**

417 **X-ray diffraction data collection and refinement statistics.**

418

|                                                     | <b>Se-Met mL-GDH<sub>180</sub></b><br>(PDB code 7JSR) |
|-----------------------------------------------------|-------------------------------------------------------|
| <b>Data collection</b>                              |                                                       |
| Space group                                         | C222 <sub>1</sub>                                     |
| Cell dimensions                                     |                                                       |
| <i>a</i> , <i>b</i> , <i>c</i> (Å)                  | 151.6, 253.5, 399.7                                   |
| $\alpha$ , $\beta$ , $\gamma$ (°)                   | 90, 90, 90                                            |
| Resolution (Å)                                      | 6.27-24.98 (6.27-7.01)                                |
| <i>R</i> <sub>merge</sub>                           | 0.055 (0.778)                                         |
| <i>I</i> / $\sigma I$                               | 10.4 (1.0)                                            |
| CC (1/2)                                            | 0.999 (0.867)                                         |
| Completeness (%)                                    | 98.4 (100)                                            |
| Redundancy                                          | 4.9 (4.9)                                             |
| <b>Refinement</b>                                   |                                                       |
| Resolution (Å)                                      | 6.27-24.98                                            |
| No. reflections                                     | 16,927                                                |
| <i>R</i> <sub>work</sub> / <i>R</i> <sub>free</sub> | 27.7/32.5                                             |
| No. atoms                                           |                                                       |
| Protein                                             | 22,997                                                |
| <i>B</i> -factors                                   |                                                       |
| Protein                                             | 472.38                                                |
| R.m.s. deviations                                   |                                                       |
| Bond lengths (Å)                                    | 0.002                                                 |
| Bond angles (°)                                     | 0.63                                                  |
| Ramachandran                                        |                                                       |
| Favored                                             | 93%                                                   |
| Allowed                                             | 6.98%                                                 |
| Outliers                                            | 0.02%                                                 |

419

420 One protein crystal was employed for structure determination. Values in parentheses are for

421 highest-resolution shell.

422 **Table 2**

423 **Cryo-EM data collection and processing.**

424

|                                      | <b>Open form</b><br>(EMD-11606) | <b>Close form</b><br>(EMD-11612) | <b>Monomer</b><br>(EMD-11613) |
|--------------------------------------|---------------------------------|----------------------------------|-------------------------------|
| Magnification                        | 47,170                          | 47,170                           | 47,170                        |
| Voltage (kV)                         | 300                             | 300                              | 300                           |
| Electron dose ( $e^-/\text{\AA}^2$ ) | 28 (14 fractions)               | 28 (14 fractions)                | 28 (14 fractions)             |
| Defocus range ( $\mu\text{m}$ )      | 0.67-3.26                       | 0.67-3.26                        | 0.67-3.26                     |
| Pixel size ( $\text{\AA}$ )          | 1.06                            | 1.06                             | 1.06                          |
| Symmetry imposed                     | D2                              | D2                               | C1                            |
| Initial particles images             | 276,704                         | 276,704                          | 276,704                       |
| Final particles images               | 63,715                          | 42,476                           | 63,715 x 4                    |
| Map resolution ( $\text{\AA}$ )      | 4.47                            | 6.6                              | 4.11                          |
| Map sharpening B factor              | 250                             | 250                              | 250                           |

425

## 426 **Methods**

### 427 **Protein production and purification**

428 The sequence coding for the L-GDH<sub>180</sub> from *M. smegmatis* MC<sup>2</sup>-155 (MSMEG\_4699, Uniprot  
429 A0R1C2) was cloned into vector pLIC-His (Cabrita et al., 2006) employing the oligonucleotides  
430 Fw: CCAGGGAGCAGCCTCGATGATTCGCCGGCTTTCGG and Rv:  
431 GCAAAGCACCGGCCTCGTTACCCAGTCGTTCCGGTCCC. The resulting plasmid was used to  
432 produce N-terminally His6-tagged mL-GDH<sub>180</sub> in *E. coli* cells. Transformed *E. coli* cells were  
433 grown at 37°C in medium supplemented with ampicillin or carbenicillin until reaching 0.8 units of  
434 optical density at 600 nm. Protein expression was then induced by adding isopropyl β-D-1-  
435 thiogalactopyranoside (IPTG) to a final concentration of 0.5 mM, and the incubation was continued  
436 for 18 hours at 14°C. Cells were harvested by centrifugation and sonicated. Following clarification  
437 by centrifugation, the supernatant was loaded onto a HisTrap HP column (GE Healthcare)  
438 equilibrated with buffer 25 mM HEPES, 500 mM NaCl, 20% v/v glycerol, 20 mM imidazole, pH  
439 8.0, and His6-tagged mL-GDH<sub>180</sub> was purified by applying a linear imidazole gradient (20-500  
440 mM). The protein was then further purified by size-exclusion chromatography, as described bellow.  
441 mL-GDH<sub>180</sub> containing fractions, as confirmed by SDS-PAGE and measurements of glutamate  
442 dehydrogenase activity (O'Hare et al., 2008), were pooled and used immediately. The protein was  
443 quantified by electronic absorption using the molar absorption coefficient of 171,090 M<sup>-1</sup> cm<sup>-1</sup>,  
444 predicted from the amino acid sequence by the ProtParam tool (<http://web.expasy.org/protparam/>).  
445 For EM and SAXS experiments, native mL-GDH<sub>180</sub> was produced in *E. coli* BL21(DE3) cells  
446 grown in LB broth. Size-exclusion chromatography was performed using a Superose 6 10/300 GL  
447 column (GE Healthcare) equilibrated in buffer 20 mM MES, 300 mM NaCl, 5 mM MgCl<sub>2</sub>, pH 6.0.  
448 Instead, Se-Met mL-GDH<sub>180</sub> for crystallographic studies was produced in *E. coli* B834 (DE3) cells  
449 grown in SelenoMethionine Medium Complete (Molecular Dimensions), and size-exclusion  
450 chromatography was carried out using a HiPrep Sephacryl S-400 HR column (GE Healthcare)  
451 equilibrated in buffer 25 mM Tris, 150 mM NaCl, pH 7.5.

452 GarA from *M. tuberculosis* was produced as previously described (England et al., 2009).

453

#### 454 **Cryo-electron microscopy**

455 4  $\mu\text{l}$  of 0.3 mg/ml mL-GDH<sub>180</sub> were applied to Quantifoil R2/2 holey carbon grids and vitrified  
456 using a Vitrobot (FEI). Data collection was carried out in a Titan Krios FEI electron microscope  
457 operated at 300 kV by a K2 direct detector (GATAN). Movie frames (1,802) were taken at a  
458 nominal magnification of  $\times 47,170$  resulting in a sampling of 1.06  $\text{\AA}/\text{pixel}$ . Each movie contained  
459 20 frames with an accumulated dose of 40  $e^-/\text{\AA}^2$ . Movie frames were aligned using MotionCor (Li  
460 et al., 2013; Zheng et al., 2017), and the final average included frames 2-15 with a total dose of 28  
461  $e^-/\text{\AA}^2$  on the sample.

462 The contrast transfer function (CTF) of the micrographs was estimated using CTFFIND4 (Rohou  
463 and Grigorieff, 2015). The particles were automatically selected from the micrographs using  
464 autopicking from RELION-3 (Zivanov et al., 2018). Evaluation of the quality of particles and  
465 selection was performed after 2D classifications with SCIPION (de la Rosa-Trevín et al., 2016) and  
466 RELION-3 (Zivanov et al., 2018) software packages. The initial volume for 3D image processing  
467 was calculated using common lines in EMAN (Tang et al., 2007) and using the algorithm 3D-  
468 RANSAC (Vargas et al., 2014). With this initial reference, additional rounds of automated particle  
469 picking were performed. An initial data set of 276,704 particles was subjected to 2D and 3D class  
470 averaging in order to select the best particles. The 3D-classification of the 106,190 final particles  
471 with imposed D2 symmetry resulted in two different conformations, a close (40%) and an open  
472 form (60%), with estimated resolutions of 6.6  $\text{\AA}$  and 4.47  $\text{\AA}$ , respectively. To improve the blurred  
473 regions of the cryo-EM maps the refinement was focused on the subunits and the final resolution  
474 was 4.11  $\text{\AA}$  for a monomer in the open conformation. This refinement focused on single mL-  
475 GDH<sub>180</sub> subunits was performed after the alignment of all the monomers following the D2  
476 symmetry, with masked subunits. Local resolution was estimated using RELION-3 (Kucukelbir et  
477 al., 2014; Zivanov et al., 2018).



478 Model fitting into cryo-EM maps was performed using the programs UCSF Chimera (Pettersen et  
479 al., 2004), Namdinator (Kidmose et al., 2019), phenix.real\_space\_refine (Afonine et al., 2018) and  
480 Coot (Emsley et al., 2010). Residues 500-1588 from the crystal structure of Se-Met mL-GDH<sub>180</sub>  
481 (see below) were fitted into the cryo-EM map of the open form of the protein. Se-methionine  
482 residues were replaced by methionine residues using Coot (Emsley et al., 2010) and the model was  
483 finally refined employing phenix.real\_space\_refine (Afonine et al., 2018) with NCS and secondary  
484 structure restraints. Overall correlation coefficients were: CC (mask): 0.73; CC (volume): 0.71; CC  
485 (peaks): 0.61. The final model contained 92% of the residues within favored regions of the  
486 Ramachandran plot and no outliers.

487 Figures were generated and rendered with UCSF Chimera (Pettersen et al., 2004).

488 Cryo-EM maps obtained for mL-GDH<sub>180</sub> were deposited in the Electron Microscopy Data Bank  
489 under the accession codes EMD-11606 (open conformation), EMD-11612 (close conformation) and  
490 EMD-11613 (monomer). Atomic coordinates for the open form of mL-GDH<sub>180</sub> derived from cryo-  
491 EM data were deposited in the Protein Data Bank under the accession code 7A1D.

492

### 493 **Negative staining electron microscopy**

494 Negative-stained grids of mL-GDH<sub>180</sub> were prepared using 2% uranyl acetate and visualized on a  
495 JEM-1230 transmission electron microscope (JEOL Europe) at an acceleration voltage of 80 kV.  
496 Images were taken in low dose conditions at a nominal magnification of x 30,000 using a GATAN  
497 CCD camera, resulting in 2.3 Å/pixel sampling.

498 Labeling of N-terminally His6-tagged mL-GDH<sub>180</sub> was performed by direct incubation of electron  
499 microscopy grids in solutions containing 5 nm Ni-NTA-Nanogold (Nanoprobes). Briefly, after glow  
500 discharging the grids, the protein was incubated for 1 minute on the grids, fixed with 2%  
501 paraformaldehyde for 10 minutes at 4°C, washed 5 minutes with PBS, incubated for 15 minutes  
502 with Nanogold diluted 1/75 in PBS, washed twice with PBS, and finally stained with 2% uranyl  
503 acetate for 45 seconds.

## 504 **Crystallization, X-ray data collection and structure determination**

505 Crystallization screenings were carried out using the sitting-drop vapor diffusion method and a  
506 Mosquito (TTP Labtech) nanoliter-dispensing crystallization robot. Crystals of Se-Met mL-GDH<sub>180</sub>  
507 grew after 4-6 months from a 16.5 mg/ml protein solution containing an equimolar amount of GarA  
508 from *M. tuberculosis*, by mixing equal volumes of protein solution and mother liquor (100 mM  
509 sodium cacodylate pH 5.8, 12% v/v glycerol, 1.25 M (NH<sub>4</sub>)<sub>2</sub>SO<sub>4</sub>), at 4 °C. Single crystals were  
510 cryoprotected in mother liquor containing 32% v/v glycerol and flash-frozen in liquid nitrogen. X-  
511 ray diffraction data were collected at the synchrotron beamline ID23-1 (European Synchrotron  
512 Radiation Facility, Grenoble, France), at 100 K, using wavelength 0.99187 Å. Diffraction data were  
513 processed using XDS (Kabsch, 2010) and scaled with Aimless (Evans and Murshudov, 2013) from  
514 the CCP4 program suite (Winn et al., 2011).

515 The crystal structure of Se-Met mL-GDH<sub>180</sub> was solved by molecular replacement using the  
516 program Phaser (McCoy et al., 2007). As search probe we used the atomic coordinates of a model  
517 built as follows. First, a poly-Ala model of mL-GDH<sub>180</sub> was obtained from a preliminary *ca.* 7 Å  
518 resolution cryo-EM map of the protein, by employing the program phenix.map\_to\_model  
519 (Terwilliger et al., 2018). Features of the catalytic domain in mL-GDH<sub>180</sub> monomers became  
520 apparent in the model, suggesting that the N-terminus of the polypeptide chains was located at the  
521 tips of the particle. This was confirmed by labeling N-terminally His6-tagged mL-GDH<sub>180</sub> with Ni-  
522 NTA-Nanogold (Nanoprobes) and visualizing particles by negative staining electron microscopy.  
523 Then, the catalytic domain of mL-GDH<sub>180</sub> (residues 702-1220) was homology-modeled by using  
524 the structure of the S-GDH<sub>50</sub> from *C. glutamicum* (PDB code 5GUD) as template and employing  
525 MODELLER (Sali and Blundell, 1994) as implemented in the HHpred server (Zimmermann et al.,  
526 2018). One copy of the model of the catalytic domain was rigid-body fitted into the 7 Å cryo-EM  
527 map of mL-GDH<sub>180</sub>, which allowed updating the starting poly-Ala model by correcting helical  
528 elements and incorporating strands corresponding to the catalytic domain in one monomer of mL-  
529 GDH<sub>180</sub>. From this, the D2 tetramer was then rebuilt by applying NCS operators detected by

530 phenix.find\_ncs (Liebschner et al., 2019) and the model was refined against the 7 Å cryo-EM map  
531 using phenix.real\_space\_refine (Afonine et al., 2018) with NCS and secondary structure restraints.  
532 Finally, one of the protein chains in the resulting model was used as search probe to solve the  
533 crystal structure of Se-Met mL-GDH<sub>180</sub> by molecular replacement.  
534 Two monomers were placed within the asymmetric unit, which taken together with nearby  
535 crystallographic symmetry mates replicate the quaternary structure observed by cryo-EM. After  
536 crystallographic refinement using phenix.refine (Afonine et al., 2012; Headd et al., 2012) with NCS  
537 and secondary structure restraints, *mFo-DFc* and *2mFo-DFc* electron density maps displayed rod-  
538 shaped electron density peaks that remained un-modeled at this stage and that most likely  
539 corresponded to helices in the N-terminal region of mL-GDH<sub>180</sub>. Phase improvement by density  
540 modification with RESOLVE (Terwilliger et al., 2007) provided additional evidence in support of  
541 such elements. The N-terminal segment of mL-GDH<sub>180</sub> (residues 1-701) was modeled *ab initio*  
542 using RaptorX (Wang et al., 2017; Xu, 2018), one of the top-ranking *ab initio* structure prediction  
543 methods according to recent CASP evaluations (Abriata et al., 2018, 2019). Raptor X works by  
544 initially estimating residue-residue contacts from residue coevolution patterns and uses the  
545 predicted contacts to drive model building; such technique has proven highly successful especially  
546 when integrated with experimental data (multiple examples overviewed in (Abriata and Dal Peraro,  
547 2020)). The residue-residue contact map predicted by RaptorX and the models produced from it  
548 revealed that the N-terminal segment of mL-GDH<sub>180</sub> comprises an array of contiguous domains,  
549 which were subsequently individually rigid-body fitted into the electron density maps. Similarly,  
550 the C-terminal domain of mL-GDH<sub>180</sub> (residues 1221-1594) was modeled *ab initio* employing  
551 RaptorX (Wang et al., 2017; Xu, 2018) and used to correct and complete the crystallographic  
552 model. Finally, un-modeled or poorly modeled segments in the CD were manually built employing  
553 Coot (Emsley et al., 2010) from a 4.11 Å resolution cryo-EM map obtained for a monomer of mL-  
554 GDH<sub>180</sub>. The structure was then further refined by iterative cycles of manual model building with  
555 Coot (Emsley et al., 2010), used to apply stereochemical restraints, and crystallographic refinement

556 of atomic coordinates and individual B-factors using phenix.refine (Afonine et al., 2012; Headd et  
557 al., 2012) with NCS and secondary structure restraints. The final model contained 93% of the  
558 residues within favored regions of the Ramachandran plot and 0.2% of outliers. The  
559 crystallographic structure of Se-Met mL-GDH<sub>180</sub> correctly explained the connecting loops and  
560 bulky amino acid side chains evidenced for residues 500-1588 by a 4.47 Å cryo-EM map of the  
561 protein. Furthermore, the position of Se-Met residues in the crystal structure of Se-Met mL-GDH<sub>180</sub>  
562 matched the position of peaks in an anomalous difference map calculated with diffraction data  
563 acquired at 0.979338 Å (12.66 keV), the Se K-edge.

564 Even though Se-Met mL-GDH<sub>180</sub> crystallized in the presence of GarA from *M. tuberculosis*,  
565 electron density maps did not reveal evidences of co-crystallization and molecular replacement  
566 attempts with Phaser (McCoy et al., 2007) using the atomic coordinates of GarA in PDBs 2KFU or  
567 6I2P failed. The evidence of helical elements in all mL-GDH<sub>180</sub> domains allows excluding the  
568 presence of GarA (an all beta protein) from modeled regions, particularly from those involved in  
569 crystal contacts (mL-GDH<sub>180</sub> residues 1-500).

570 Figures were generated and rendered with UCSF Chimera (Pettersen et al., 2004) or Pymol version  
571 1.8.x (Schrödinger, LLC).

572 Atomic coordinates and structure factors obtained for Se-Met mL-GDH<sub>180</sub> were deposited in the  
573 Protein Data Bank under the accession code 7JSR.

574

### 575 **Small angle X-ray scattering**

576 Synchrotron SAXS data were collected at BioSAXS ID14EH3 beamline (European Synchrotron  
577 Radiation Facility, Grenoble, France) and recorded at 15°C using a PILATUS 1M pixel detector  
578 (DECTRIS) at a sample-detector distance of 2.43 m and a wavelength of 0.931 Å, resulting  
579 momentum transfer ( $s$ ) ranging from 0.009 to 0.6 Å<sup>-1</sup>.

580 mL-GDH<sub>180</sub> was assayed at concentrations ranging from 1 to 14 mg/ml in buffer 25 mM Tris, 150  
581 mM NaCl, pH 7.5. For the buffer and the samples, ten 2D scattering images were acquired and

582 processed to obtain radially averaged 1D curves of normalized intensity versus scattering angle. In  
583 order to optimize background subtraction, buffer scattering profiles recorded before and after  
584 measuring every sample were averaged. Then, for each protein sample, the contribution of the  
585 buffer was subtracted. All subsequent data processing was performed using the ATSAS suite  
586 (Franke et al., 2017).

587 Average scattering curves corresponding to different protein concentrations were compared using  
588 PRIMUS (Franke et al., 2017; Konarev et al., 2003). To obtain the idealized scattering curve the  
589 low  $s$  region of the most diluted sample and the high  $s$  region of the most concentrated sample were  
590 merged. The values of the forward scattering intensity  $I(0)$ , the radius of gyration  $R_g$  as well as the  
591 dimensionless Kratky plot were calculated using PRIMUS (Franke et al., 2017; Konarev et al.,  
592 2003). Guinier plots of independent average scattering curves evidenced a constant  $R_g$  at different  
593 protein concentrations. The Porod volume was estimated using DATPOROD (Franke et al., 2017)  
594 and an  $s_{\max}$  value equal to  $7.5/R_g$ . The pairwise distance distribution function  $p(r)$  and the maximum  
595 particle dimension  $D_{\max}$  were calculated using GNOM (Franke et al., 2017; Svergun, 1992) with a  
596 reduced  $\chi^2$  value of 1.07 for curve fitting. After running DAMMIN (Franke et al., 2017; Svergun,  
597 1999) the excluded volume was estimated as  $V_{\text{ex}} = \text{volume of a single dummy atom} \times \text{number of}$   
598  $\text{dummy atoms} / 0.74$ ). Finally, the MW was estimated from the Porod volume and the excluded  
599 volume.
